# Supplementary material
Source: Elsevier journal article supplement (https://publikationen.ub.uni-frankfurt.de/files/44109/mmc1.docx)
Supplement: mmc1 [file mmc1.docx]

**SUPPORTING INFORMATION**

A single-dose, randomized, cross-over, two-way, open-label study for comparing the absorption of boswellic acids and its lecithin formulation

*Antonella Riva, a Paolo Morazzoni, a Christian Artaria, a Pietro Allegrini,* *a Jürgen Meins,b Daniele Savio, cGiovanni Appendino,* *d Manfred Schubert-Zsilavecz,e and Mona Abdel-Tawab b **

*a*Indena S.p.A., Viale Ortles 12, Milano, Italy

*b*Central Laboratory of German Pharmacists, Carl-Mannich-Str. 20, 65760 Eschborn, Germany

*c*R&D Solution s.r.l., Via Luigi Perna, 51 00142 Roma, Italy.

*d*Dipartimento di Scienze del Farmaco, Università del Piemonte Orientale, Via Bovio 6, 28100, Novara, Italy

*e*Department of Pharmaceutical Chemistry, Goethe-University Frankfurt, Max-von-Laue Strasse 9, 60438 Frankfurt am Main, Germany

**CONTENTS:**

**Figure S1**. Cmax comparison.………………………………………………………………… Page 3

**Figure S2**. AUClast comparison………… ……………… ……………………………..Page 4

**Figure S3**. AUCtot comparison…………… …………………………………………….... Page 5

**Figure S4.** tmax comparison ………………… ………………………………………………Page 6

**Analytical method validation** …………………………………………………………… Page 7

**Figure S1.** Cmax comparison based on the ratios and 90%CI of the geometric means of CSPand BE for the 6 BAs. The vertical red line is the upper 90% acceptance limit for bioequivalence. The 90%CIs which are entirely on the right of this line indicate the superiority of CSPformulation.

Dotted points on the graph indicate the equiweight dosage data, squared points indicate the corrected dosage data.

**Figure S2.** AUClast comparison based on the ratios and 90%CI of the geometric means of CSPand BE for the 6 BAs. The vertical red line is the upper 90% acceptance limit for bioequivalence. The 90%CIs which are entirely on the right of this line indicate the superiority of CSP.

Dotted points on the graph indicate the equiweight dosage data, squared points indicate the corrected dosage data.

**Figure S3**. AUCtot comparison based on the ratios and 90%CI of the geometric means of CSPand BE for the 6 BAs. The vertical red line is the upper 90% acceptance limit for bioequivalence. The 90%CIs which are entirely on the right of this line indicate the superiority of CSP.

Dotted points on the graph indicate the equiweight dosage data, squared points indicate the corrected dosage data.

**.**


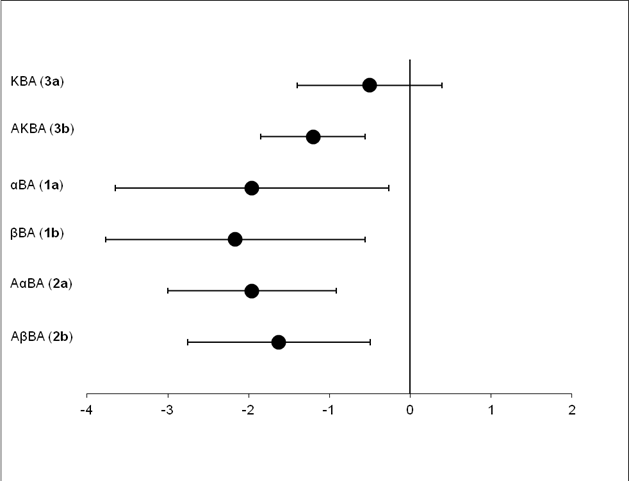


Figure S4. Tmax (h) differences and 90%CI between the Least squares means of CSP and BE of the 6 BAs quantified in plasma.

**Analytical method validation**

No interfering peaks were detected at the retention times of the respective BA and internal standard. Linearity was given in the range of 0.5–12,000 ng/ml plasma for αBA, AαBA, βBA and AβBA, respectively, and in the range of 5.0–3000 ng/ml plasma for AKBA and KBA, respectively. The coefficients of correlation (r) were always above 0.98, resulting in values of r in the range of 0.9934–0.9992. All values for intra- and interday accuracy and precision met the international requirements for bioanalytical method validation, not exceeding 11.7% for the intra- and interday precision and a bias of -12.9% for the intra- and interday accuracy considering all BAs.

The relative recovery, determined by comparing the peak areas of post-extraction blank plasma spiked with BAs and the respective areas in processed samples averaged 74.3% at the lowest and 83.5% at the highest BA concentration level. Moreover all BAs revealed to be stable, as no decrease in the analyte concentration was observed after three freeze/ thaw cycles and storage at room temperature for 24 h.
